# Supplementary material for: Purkinje Cardiomyocytes of the Adult Ventricular Conduction System Are Highly Diploid but Not Uniquely Regenerative
Source: MDPI journal article supplement (doi:10.3390/jcdd10040161), 2023-04-07
Supplement: s1 [file s1]

Supplementary Materials for Watanabe et al.

**Supplemental Table S1.** Statistical values for comparisons made in Figure 3B, calculated using Student T-test. Background color in Table S1 and Table S2 indicate values of statistical significance.

|      |      | Total | 2n     | 4n    | 8n    |
|------|------|-------|--------|-------|-------|
| GFP- | GFP+ | 0.005 | 7.6E-7 | 0.148 | 0.157 |

**Supplemental Table S2.** Statistical values for comparisons made in Figure 3C, calculated using Tukey-Kramer correction for multiple comparisons.

|          |          | 1x2n    | 1x4n    | 2x2n    | 1x8n   | 2x4n   | 4x2n    |
|----------|----------|---------|---------|---------|--------|--------|---------|
| GFP-Edu+ | GFP-Edu- | 0.9833  | 0.9837  | 0.1327  | 0.8478 | 0.0272 | 0.4434  |
| GFP+Edu- | GFP+Edu+ | 0.0005  | 0.0081  | 0.8453  | 0.0951 | 0.0438 | 1       |
| GFP+Edu+ | GFP-Edu+ | 2.1E-05 | 7.0E-10 | 0.0009  | 0.1160 | 0.1857 | 7.1E-06 |
| GFP+Edu- | GFP-Edu- | 2.6E-09 | 2.7E-07 | 5.4E-05 | 0.9437 | 0.1734 | 0.0001  |

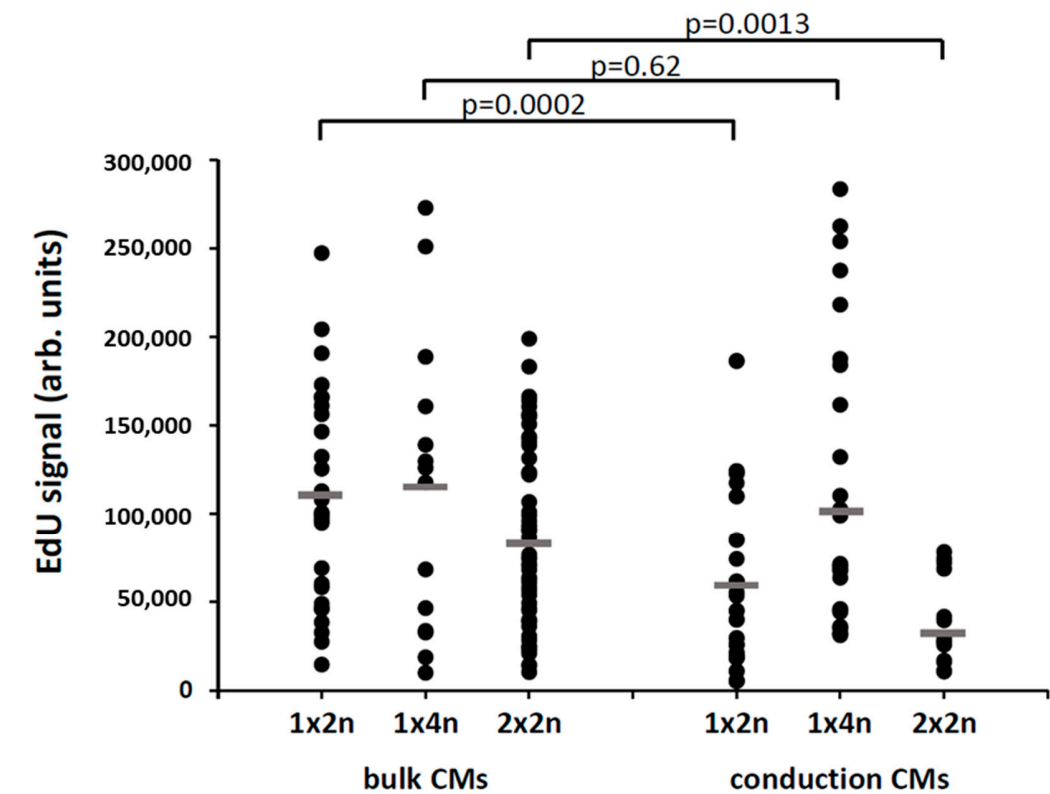

**Supplementary Figure S1.** Intensity of EdU signals by bulk and conduction CM ploidy class following neonatal EdU exposure, in arbitrary units; grey bars indicate average.
